# Supplementary material for: Zirconium complexes bearing a tetradentate dipyrrolyl ligand
Source: Royal Society of Chemistry journal article supplement (doi:10.1039/b804172e), 2008-01-01

## Zirconium Complexes Bearing a Tetradentate Dipyrrolyl Ligand

Eyal Barnea<sup>a</sup> and Aaron L. Odom\*

Michigan State University, Department of Chemistry, East Lansing, MI, 48824, USA. E-mail:  
odom@chemistry.msu.edu

|                                                                                                                 |    |
|-----------------------------------------------------------------------------------------------------------------|----|
| A. X-ray Diffraction Data for Zr(NMe <sub>2</sub> ) <sub>2</sub> (enp) ( <b>2</b> ) .....                       | 2  |
| B. X-ray Diffraction Data for Zr(NHPh) <sub>2</sub> (enp) ( <b>3a</b> ) .....                                   | 13 |
| C. <sup>1</sup> H-NMR spectrum of complex <b>2</b> , with proton assignment (500 MHz, CDCl <sub>3</sub> ) ..... | 24 |

A. X-ray Diffraction Data for  $\text{Zr}(\text{NMe}_2)_2(\text{enp})$  (**2**)

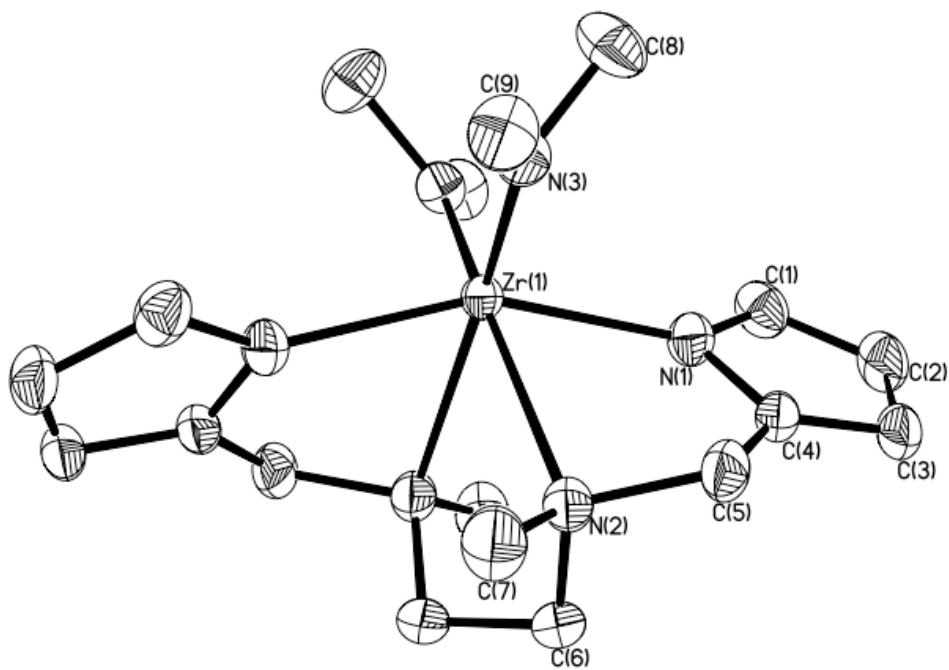

Table 1. Crystal data and structure refinement for ebzrenp.

|                                   |                                                                                                                            |
|-----------------------------------|----------------------------------------------------------------------------------------------------------------------------|
| Identification code               | ebzrenp                                                                                                                    |
| Empirical formula                 | C18 H32 N6 Zr                                                                                                              |
| Formula weight                    | 423.72                                                                                                                     |
| Temperature                       | 173(2) K                                                                                                                   |
| Wavelength                        | 0.71073 Å                                                                                                                  |
| Crystal system                    | Orthorhombic                                                                                                               |
| Space group                       | F d d 2                                                                                                                    |
| Unit cell dimensions              | a = 29.9669(11) Å $\alpha = 90^\circ$ .<br>b = 10.0542(4) Å $\beta = 90^\circ$ .<br>c = 13.4751(5) Å $\gamma = 90^\circ$ . |
| Volume                            | 4060.0(3) Å <sup>3</sup>                                                                                                   |
| Z                                 | 8                                                                                                                          |
| Density (calculated)              | 1.386 Mg/m <sup>3</sup>                                                                                                    |
| Absorption coefficient            | 0.555 mm <sup>-1</sup>                                                                                                     |
| F(000)                            | 1776                                                                                                                       |
| Crystal size                      | 0.28 x 0.27 x 0.20 mm <sup>3</sup>                                                                                         |
| Theta range for data collection   | 2.62 to 25.39°.                                                                                                            |
| Index ranges                      | -36<=h<=36, -12<=k<=12, -16<=l<=16                                                                                         |
| Reflections collected             | 9124                                                                                                                       |
| Independent reflections           | 1858 [R(int) = 0.0161]                                                                                                     |
| Completeness to theta = 25.00°    | 99.8 %                                                                                                                     |
| Absorption correction             | Semi-empirical from equivalents                                                                                            |
| Max. and min. transmission        | 0.8976 and 0.8593                                                                                                          |
| Refinement method                 | Full-matrix least-squares on F <sup>2</sup>                                                                                |
| Data / restraints / parameters    | 1858 / 1 / 117                                                                                                             |
| Goodness-of-fit on F <sup>2</sup> | 1.192                                                                                                                      |
| Final R indices [I>2sigma(I)]     | R1 = 0.0129, wR2 = 0.0363                                                                                                  |
| R indices (all data)              | R1 = 0.0132, wR2 = 0.0365                                                                                                  |
| Absolute structure parameter      | -0.01(3)                                                                                                                   |
| Largest diff. peak and hole       | 0.179 and -0.114 e.Å <sup>-3</sup>                                                                                         |

Table 2. Atomic coordinates ( $\times 10^4$ ) and equivalent isotropic displacement parameters ( $\text{\AA}^2 \times 10^3$ ) for ebzrenp.  $U(\text{eq})$  is defined as one third of the trace of the orthogonalized  $U^{ij}$  tensor.

|       | x       | y        | z       | $U(\text{eq})$ |
|-------|---------|----------|---------|----------------|
| Zr(1) | 10000   | 10000    | 8260(1) | 19(1)          |
| N(1)  | 9636(1) | 8126(1)  | 7924(1) | 27(1)          |
| N(2)  | 9532(1) | 10363(2) | 6779(1) | 28(1)          |
| N(3)  | 9533(1) | 10856(1) | 9164(1) | 27(1)          |
| C(1)  | 9679(1) | 6793(2)  | 8156(1) | 34(1)          |
| C(2)  | 9342(1) | 6075(2)  | 7726(1) | 38(1)          |
| C(3)  | 9072(1) | 6982(2)  | 7205(1) | 36(1)          |
| C(4)  | 9259(1) | 8214(2)  | 7343(1) | 28(1)          |
| C(5)  | 9121(1) | 9555(2)  | 6995(1) | 32(1)          |
| C(6)  | 9756(1) | 9804(2)  | 5887(1) | 35(1)          |
| C(7)  | 9405(1) | 11758(2) | 6584(1) | 41(1)          |
| C(8)  | 9430(1) | 9937(2)  | 9968(2) | 43(1)          |
| C(9)  | 9246(1) | 12016(2) | 9229(2) | 39(1)          |

Table 3. Bond lengths [Å] and angles [°] for ebzrenp.

---

|              |            |
|--------------|------------|
| Zr(1)-N(3)   | 2.0454(12) |
| Zr(1)-N(3)#1 | 2.0454(12) |
| Zr(1)-N(1)   | 2.2233(13) |
| Zr(1)-N(1)#1 | 2.2234(13) |
| Zr(1)-N(2)#1 | 2.4659(15) |
| Zr(1)-N(2)   | 2.4659(15) |
| N(1)-C(4)    | 1.378(2)   |
| N(1)-C(1)    | 1.382(2)   |
| N(2)-C(7)    | 1.477(2)   |
| N(2)-C(6)    | 1.488(2)   |
| N(2)-C(5)    | 1.503(2)   |
| N(3)-C(9)    | 1.451(2)   |
| N(3)-C(8)    | 1.457(2)   |
| C(1)-C(2)    | 1.369(2)   |
| C(1)-H(1)    | 0.9500     |
| C(2)-C(3)    | 1.408(3)   |
| C(2)-H(2)    | 0.9500     |
| C(3)-C(4)    | 1.373(2)   |
| C(3)-H(3)    | 0.9500     |
| C(4)-C(5)    | 1.486(3)   |
| C(5)-H(5A)   | 0.9900     |
| C(5)-H(5B)   | 0.9900     |
| C(6)-C(6)#1  | 1.515(4)   |
| C(6)-H(6A)   | 0.9900     |
| C(6)-H(6B)   | 0.9900     |
| C(7)-H(7A)   | 0.9800     |
| C(7)-H(7B)   | 0.9800     |
| C(7)-H(7C)   | 0.9800     |
| C(8)-H(8A)   | 0.9800     |
| C(8)-H(8B)   | 0.9800     |
| C(8)-H(8C)   | 0.9800     |
| C(9)-H(9A)   | 0.9800     |

|                     |            |
|---------------------|------------|
| C(9)-H(9B)          | 0.9800     |
| C(9)-H(9C)          | 0.9800     |
| N(3)-Zr(1)-N(3)#1   | 106.86(7)  |
| N(3)-Zr(1)-N(1)     | 98.20(5)   |
| N(3)#1-Zr(1)-N(1)   | 95.73(5)   |
| N(3)-Zr(1)-N(1)#1   | 95.74(5)   |
| N(3)#1-Zr(1)-N(1)#1 | 98.20(5)   |
| N(1)-Zr(1)-N(1)#1   | 156.51(6)  |
| N(3)-Zr(1)-N(2)#1   | 158.99(5)  |
| N(3)#1-Zr(1)-N(2)#1 | 91.74(5)   |
| N(1)-Zr(1)-N(2)#1   | 89.36(5)   |
| N(1)#1-Zr(1)-N(2)#1 | 71.45(5)   |
| N(3)-Zr(1)-N(2)     | 91.74(5)   |
| N(3)#1-Zr(1)-N(2)   | 158.99(5)  |
| N(1)-Zr(1)-N(2)     | 71.45(5)   |
| N(1)#1-Zr(1)-N(2)   | 89.37(5)   |
| N(2)#1-Zr(1)-N(2)   | 72.04(7)   |
| C(4)-N(1)-C(1)      | 105.51(13) |
| C(4)-N(1)-Zr(1)     | 117.59(10) |
| C(1)-N(1)-Zr(1)     | 136.89(10) |
| C(7)-N(2)-C(6)      | 109.32(14) |
| C(7)-N(2)-C(5)      | 109.66(13) |
| C(6)-N(2)-C(5)      | 108.77(13) |
| C(7)-N(2)-Zr(1)     | 115.57(11) |
| C(6)-N(2)-Zr(1)     | 109.94(11) |
| C(5)-N(2)-Zr(1)     | 103.29(9)  |
| C(9)-N(3)-C(8)      | 109.85(14) |
| C(9)-N(3)-Zr(1)     | 141.18(12) |
| C(8)-N(3)-Zr(1)     | 108.71(11) |
| C(2)-C(1)-N(1)      | 110.30(14) |
| C(2)-C(1)-H(1)      | 124.8      |
| N(1)-C(1)-H(1)      | 124.8      |
| C(1)-C(2)-C(3)      | 107.10(14) |

|                   |            |
|-------------------|------------|
| C(1)-C(2)-H(2)    | 126.4      |
| C(3)-C(2)-H(2)    | 126.4      |
| C(4)-C(3)-C(2)    | 106.36(15) |
| C(4)-C(3)-H(3)    | 126.8      |
| C(2)-C(3)-H(3)    | 126.8      |
| C(3)-C(4)-N(1)    | 110.72(16) |
| C(3)-C(4)-C(5)    | 131.49(17) |
| N(1)-C(4)-C(5)    | 117.78(14) |
| C(4)-C(5)-N(2)    | 108.87(13) |
| C(4)-C(5)-H(5A)   | 109.9      |
| N(2)-C(5)-H(5A)   | 109.9      |
| C(4)-C(5)-H(5B)   | 109.9      |
| N(2)-C(5)-H(5B)   | 109.9      |
| H(5A)-C(5)-H(5B)  | 108.3      |
| N(2)-C(6)-C(6)#1  | 109.75(11) |
| N(2)-C(6)-H(6A)   | 109.7      |
| C(6)#1-C(6)-H(6A) | 109.7      |
| N(2)-C(6)-H(6B)   | 109.7      |
| C(6)#1-C(6)-H(6B) | 109.7      |
| H(6A)-C(6)-H(6B)  | 108.2      |
| N(2)-C(7)-H(7A)   | 109.5      |
| N(2)-C(7)-H(7B)   | 109.5      |
| H(7A)-C(7)-H(7B)  | 109.5      |
| N(2)-C(7)-H(7C)   | 109.5      |
| H(7A)-C(7)-H(7C)  | 109.5      |
| H(7B)-C(7)-H(7C)  | 109.5      |
| N(3)-C(8)-H(8A)   | 109.5      |
| N(3)-C(8)-H(8B)   | 109.5      |
| H(8A)-C(8)-H(8B)  | 109.5      |
| N(3)-C(8)-H(8C)   | 109.5      |
| H(8A)-C(8)-H(8C)  | 109.5      |
| H(8B)-C(8)-H(8C)  | 109.5      |
| N(3)-C(9)-H(9A)   | 109.5      |
| N(3)-C(9)-H(9B)   | 109.5      |

|                  |       |
|------------------|-------|
| H(9A)-C(9)-H(9B) | 109.5 |
| N(3)-C(9)-H(9C)  | 109.5 |
| H(9A)-C(9)-H(9C) | 109.5 |
| H(9B)-C(9)-H(9C) | 109.5 |

---

Symmetry transformations used to generate equivalent atoms:

#1  $-x+2,-y+2,z$



Table 4. Anisotropic displacement parameters ( $\text{\AA}^2 \times 10^3$ ) for ebzrenp. The anisotropic displacement factor exponent takes the form:  $-2p^2[ h^2 a^* 2U^{11} + \dots + 2 h k a^* b^* U^{12} ]$

|       | $U^{11}$ | $U^{22}$ | $U^{33}$ | $U^{23}$ | $U^{13}$ | $U^{12}$ |
|-------|----------|----------|----------|----------|----------|----------|
| Zr(1) | 19(1)    | 18(1)    | 20(1)    | 0        | 0        | 0(1)     |
| N(1)  | 31(1)    | 21(1)    | 31(1)    | -1(1)    | 0(1)     | -3(1)    |
| N(2)  | 27(1)    | 30(1)    | 28(1)    | 4(1)     | -3(1)    | -6(1)    |
| N(3)  | 24(1)    | 28(1)    | 30(1)    | -5(1)    | 2(1)     | 2(1)     |
| C(1)  | 39(1)    | 25(1)    | 38(1)    | 2(1)     | 6(1)     | -1(1)    |
| C(2)  | 50(1)    | 23(1)    | 42(1)    | -4(1)    | 8(1)     | -13(1)   |
| C(3)  | 39(1)    | 36(1)    | 32(1)    | -8(1)    | 6(1)     | -18(1)   |
| C(4)  | 27(1)    | 33(1)    | 25(1)    | -5(1)    | 3(1)     | -10(1)   |
| C(5)  | 23(1)    | 36(1)    | 35(1)    | 3(1)     | -5(1)    | -7(1)    |
| C(6)  | 40(1)    | 44(1)    | 21(1)    | 0(1)     | -2(1)    | -13(1)   |
| C(7)  | 39(1)    | 35(1)    | 49(1)    | 13(1)    | -14(1)   | -2(1)    |
| C(8)  | 42(1)    | 44(1)    | 42(1)    | 4(1)     | 19(1)    | 2(1)     |
| C(9)  | 32(1)    | 38(1)    | 47(1)    | -7(1)    | 2(1)     | 5(1)     |

Table 5. Hydrogen coordinates ( $\times 10^4$ ) and isotropic displacement parameters ( $\text{\AA}^2 \times 10^3$ ) for ebzrenp.

|       | x    | y     | z     | U(eq) |
|-------|------|-------|-------|-------|
| H(1)  | 9909 | 6428  | 8557  | 41    |
| H(2)  | 9299 | 5141  | 7771  | 46    |
| H(3)  | 8811 | 6781  | 6832  | 43    |
| H(5A) | 8940 | 10000 | 7512  | 38    |
| H(5B) | 8937 | 9474  | 6387  | 38    |
| H(6A) | 9610 | 10146 | 5279  | 42    |
| H(6B) | 9729 | 8823  | 5889  | 42    |
| H(7A) | 9674 | 12288 | 6465  | 61    |
| H(7B) | 9244 | 12115 | 7159  | 61    |
| H(7C) | 9211 | 11796 | 5998  | 61    |
| H(8A) | 9477 | 10381 | 10607 | 64    |
| H(8B) | 9626 | 9159  | 9923  | 64    |
| H(8C) | 9118 | 9651  | 9915  | 64    |
| H(9A) | 8937 | 11755 | 9094  | 58    |
| H(9B) | 9342 | 12679 | 8740  | 58    |
| H(9C) | 9266 | 12397 | 9897  | 58    |

Table 6. Torsion angles [°] for ebzrenp.

---

|                        |             |
|------------------------|-------------|
| N(3)-Zr(1)-N(1)-C(4)   | 68.89(12)   |
| N(3)#1-Zr(1)-N(1)-C(4) | 176.89(11)  |
| N(1)#1-Zr(1)-N(1)-C(4) | -56.90(11)  |
| N(2)#1-Zr(1)-N(1)-C(4) | -91.43(12)  |
| N(2)-Zr(1)-N(1)-C(4)   | -20.19(11)  |
| N(3)-Zr(1)-N(1)-C(1)   | -110.11(14) |
| N(3)#1-Zr(1)-N(1)-C(1) | -2.11(14)   |
| N(1)#1-Zr(1)-N(1)-C(1) | 124.09(14)  |
| N(2)#1-Zr(1)-N(1)-C(1) | 89.57(14)   |
| N(2)-Zr(1)-N(1)-C(1)   | 160.81(15)  |
| N(3)-Zr(1)-N(2)-C(7)   | 57.62(12)   |
| N(3)#1-Zr(1)-N(2)-C(7) | -149.74(13) |
| N(1)-Zr(1)-N(2)-C(7)   | 155.68(13)  |
| N(1)#1-Zr(1)-N(2)-C(7) | -38.10(12)  |
| N(2)#1-Zr(1)-N(2)-C(7) | -108.78(13) |
| N(3)-Zr(1)-N(2)-C(6)   | -178.07(10) |
| N(3)#1-Zr(1)-N(2)-C(6) | -25.4(2)    |
| N(1)-Zr(1)-N(2)-C(6)   | -80.01(11)  |
| N(1)#1-Zr(1)-N(2)-C(6) | 86.21(11)   |
| N(2)#1-Zr(1)-N(2)-C(6) | 15.53(7)    |
| N(3)-Zr(1)-N(2)-C(5)   | -62.13(11)  |
| N(3)#1-Zr(1)-N(2)-C(5) | 90.51(16)   |
| N(1)-Zr(1)-N(2)-C(5)   | 35.93(10)   |
| N(1)#1-Zr(1)-N(2)-C(5) | -157.85(11) |
| N(2)#1-Zr(1)-N(2)-C(5) | 131.47(14)  |
| N(3)#1-Zr(1)-N(3)-C(9) | 143.34(19)  |
| N(1)-Zr(1)-N(3)-C(9)   | -118.08(18) |
| N(1)#1-Zr(1)-N(3)-C(9) | 42.96(18)   |
| N(2)#1-Zr(1)-N(3)-C(9) | -8.0(3)     |
| N(2)-Zr(1)-N(3)-C(9)   | -46.57(18)  |
| N(3)#1-Zr(1)-N(3)-C(8) | -43.43(12)  |
| N(1)-Zr(1)-N(3)-C(8)   | 55.15(13)   |

|                        |             |
|------------------------|-------------|
| N(1)#1-Zr(1)-N(3)-C(8) | -143.81(13) |
| N(2)#1-Zr(1)-N(3)-C(8) | 165.25(16)  |
| N(2)-Zr(1)-N(3)-C(8)   | 126.65(13)  |
| C(4)-N(1)-C(1)-C(2)    | 0.57(17)    |
| Zr(1)-N(1)-C(1)-C(2)   | 179.65(12)  |
| N(1)-C(1)-C(2)-C(3)    | -0.42(19)   |
| C(1)-C(2)-C(3)-C(4)    | 0.09(19)    |
| C(2)-C(3)-C(4)-N(1)    | 0.26(18)    |
| C(2)-C(3)-C(4)-C(5)    | -178.69(17) |
| C(1)-N(1)-C(4)-C(3)    | -0.51(17)   |
| Zr(1)-N(1)-C(4)-C(3)   | -179.80(10) |
| C(1)-N(1)-C(4)-C(5)    | 178.60(14)  |
| Zr(1)-N(1)-C(4)-C(5)   | -0.69(19)   |
| C(3)-C(4)-C(5)-N(2)    | -145.19(16) |
| N(1)-C(4)-C(5)-N(2)    | 35.9(2)     |
| C(7)-N(2)-C(5)-C(4)    | -171.23(14) |
| C(6)-N(2)-C(5)-C(4)    | 69.27(17)   |
| Zr(1)-N(2)-C(5)-C(4)   | -47.50(15)  |
| C(7)-N(2)-C(6)-C(6)#1  | 82.92(19)   |
| C(5)-N(2)-C(6)-C(6)#1  | -157.37(15) |
| Zr(1)-N(2)-C(6)-C(6)#1 | -44.94(18)  |

---

Symmetry transformations used to generate equivalent atoms:

#1 -x+2,-y+2,z

B. X-ray Diffraction Data for  $\text{Zr}(\text{NHPH})_2(\text{enp})$  (**3a**)

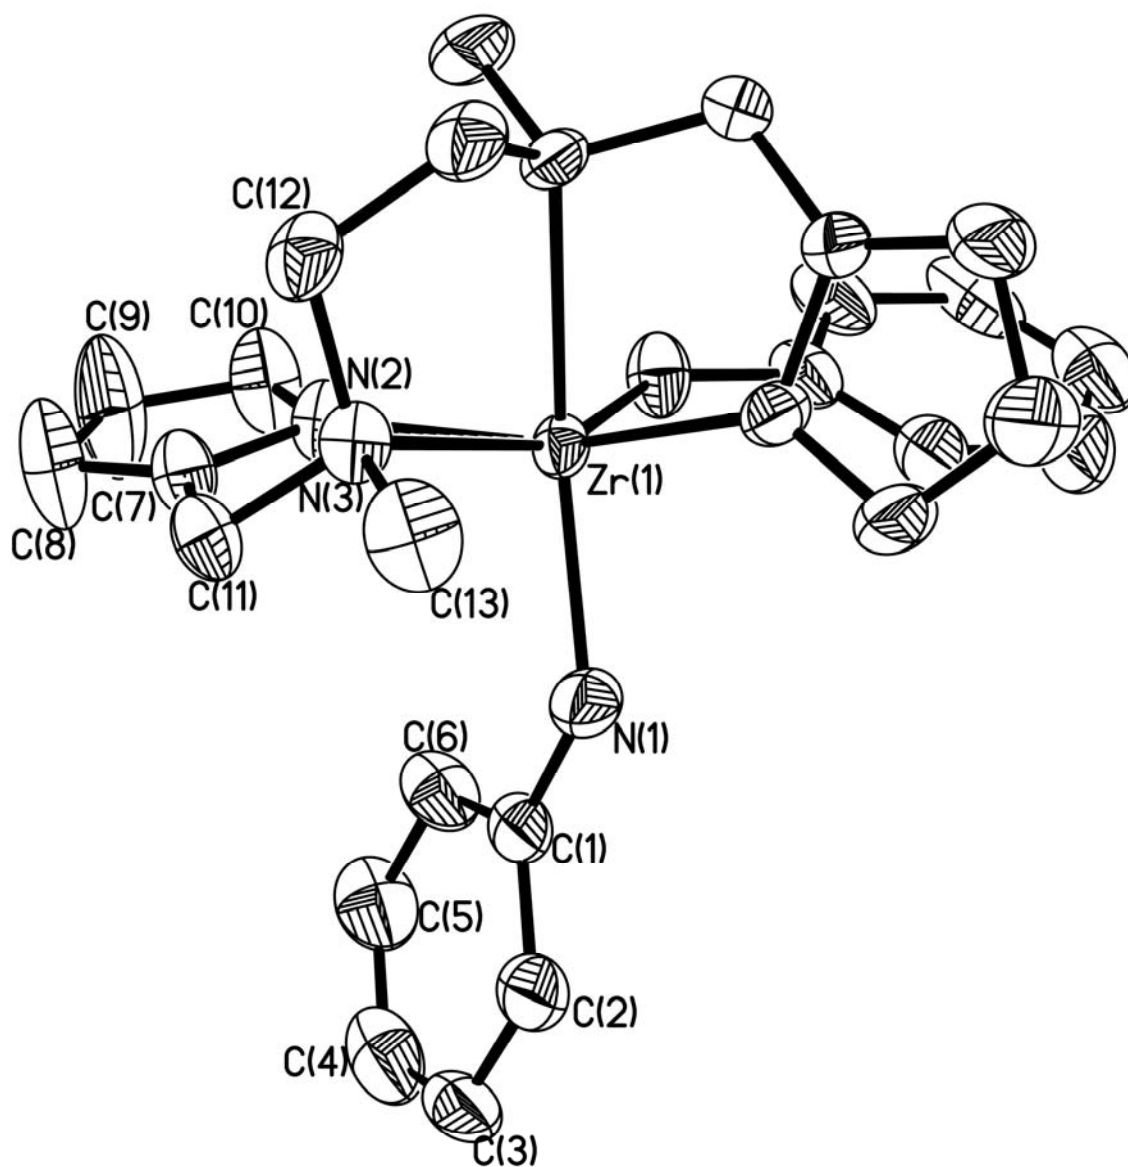

Table 1. Crystal data and structure refinement for ebzrenppnh2\_0m.

|                                   |                                             |                       |
|-----------------------------------|---------------------------------------------|-----------------------|
| Identification code               | ebzrenppnh2_0m                              |                       |
| Empirical formula                 | C26 H32 N6 Zr                               |                       |
| Formula weight                    | 519.80                                      |                       |
| Temperature                       | 173(2) K                                    |                       |
| Wavelength                        | 0.71073 Å                                   |                       |
| Crystal system                    | Orthorhombic                                |                       |
| Space group                       | Pccn                                        |                       |
| Unit cell dimensions              | a = 12.0136(2) Å                            | $\alpha = 90^\circ$ . |
|                                   | b = 12.4957(2) Å                            | $\beta = 90^\circ$ .  |
|                                   | c = 16.9666(3) Å                            | $\gamma = 90^\circ$ . |
| Volume                            | 2547.00(7) Å <sup>3</sup>                   |                       |
| Z                                 | 4                                           |                       |
| Density (calculated)              | 1.356 Mg/m <sup>3</sup>                     |                       |
| Absorption coefficient            | 0.456 mm <sup>-1</sup>                      |                       |
| F(000)                            | 1080                                        |                       |
| Crystal size                      | 0.24 x 0.18 x 0.06 mm <sup>3</sup>          |                       |
| Theta range for data collection   | 2.35 to 28.00°.                             |                       |
| Index ranges                      | -15<=h<=15, -16<=k<=15, -22<=l<=19          |                       |
| Reflections collected             | 24698                                       |                       |
| Independent reflections           | 3014 [R(int) = 0.0619]                      |                       |
| Completeness to theta = 25.00°    | 100.0 %                                     |                       |
| Absorption correction             | None                                        |                       |
| Refinement method                 | Full-matrix least-squares on F <sup>2</sup> |                       |
| Data / restraints / parameters    | 3014 / 0 / 151                              |                       |
| Goodness-of-fit on F <sup>2</sup> | 0.993                                       |                       |
| Final R indices [I>2sigma(I)]     | R1 = 0.0360, wR2 = 0.0756                   |                       |
| R indices (all data)              | R1 = 0.0802, wR2 = 0.0899                   |                       |
| Extinction coefficient            | 0.00017(17)                                 |                       |
| Largest diff. peak and hole       | 0.326 and -0.386 e.Å <sup>-3</sup>          |                       |

Table 2. Atomic coordinates ( $\times 10^4$ ) and equivalent isotropic displacement parameters ( $\text{\AA}^2 \times 10^3$ ) for ebzrenpphh2\_0m.  $U(\text{eq})$  is defined as one third of the trace of the orthogonalized  $U^{ij}$  tensor.

|       | x       | y       | z       | $U(\text{eq})$ |
|-------|---------|---------|---------|----------------|
| Zr(1) | 2500    | 2500    | 4654(1) | 26(1)          |
| N(1)  | 2500(2) | 3852(2) | 3928(1) | 39(1)          |
| N(2)  | 4266(2) | 2273(2) | 4884(1) | 33(1)          |
| N(3)  | 2982(2) | 3559(2) | 5786(1) | 31(1)          |
| C(9)  | 6095(3) | 1919(3) | 4914(3) | 81(1)          |
| C(8)  | 5911(3) | 2871(3) | 5340(2) | 66(1)          |
| C(4)  | 4866(4) | 5167(4) | 2387(2) | 65(1)          |
| C(5)  | 4989(3) | 4160(4) | 2669(2) | 60(1)          |
| C(3)  | 3944(3) | 5761(3) | 2595(2) | 61(1)          |
| C(13) | 2233(2) | 4487(2) | 5917(2) | 51(1)          |
| C(10) | 5091(2) | 1574(3) | 4657(2) | 51(1)          |
| C(2)  | 3135(3) | 5328(3) | 3107(2) | 49(1)          |
| C(6)  | 4203(3) | 3723(3) | 3169(2) | 48(1)          |
| C(12) | 2996(2) | 2867(2) | 6499(2) | 41(1)          |
| C(1)  | 3263(2) | 4301(2) | 3402(2) | 38(1)          |
| C(11) | 4122(2) | 3966(2) | 5614(2) | 37(1)          |
| C(7)  | 4807(2) | 3066(2) | 5311(2) | 36(1)          |

Table 3. Bond lengths [Å] and angles [°] for ebzrenppnh2\_0m.

---

|              |          |
|--------------|----------|
| Zr(1)-N(1)   | 2.091(2) |
| Zr(1)-N(1)#1 | 2.091(2) |
| Zr(1)-N(2)   | 2.176(2) |
| Zr(1)-N(2)#1 | 2.176(2) |
| Zr(1)-N(3)   | 2.403(2) |
| Zr(1)-N(3)#1 | 2.403(2) |
| N(1)-C(1)    | 1.398(3) |
| N(1)-H(1A)   | 0.8800   |
| N(2)-C(10)   | 1.376(3) |
| N(2)-C(7)    | 1.390(3) |
| N(3)-C(12)   | 1.486(3) |
| N(3)-C(11)   | 1.491(3) |
| N(3)-C(13)   | 1.485(3) |
| C(9)-C(10)   | 1.353(4) |
| C(9)-C(8)    | 1.409(5) |
| C(9)-H(9A)   | 0.9500   |
| C(8)-C(7)    | 1.349(4) |
| C(8)-H(8A)   | 0.9500   |
| C(4)-C(5)    | 1.354(5) |
| C(4)-C(3)    | 1.378(5) |
| C(4)-H(4A)   | 0.9500   |
| C(5)-C(6)    | 1.382(4) |
| C(5)-H(5A)   | 0.9500   |
| C(3)-C(2)    | 1.410(5) |
| C(3)-H(3A)   | 0.9500   |
| C(13)-H(13A) | 0.9800   |
| C(13)-H(13B) | 0.9800   |
| C(13)-H(13C) | 0.9800   |
| C(10)-H(10A) | 0.9500   |
| C(2)-C(1)    | 1.385(4) |
| C(2)-H(2A)   | 0.9500   |
| C(6)-C(1)    | 1.398(4) |



|                     |            |
|---------------------|------------|
| C(6)-H(6A)          | 0.9500     |
| C(12)-C(12)#1       | 1.504(6)   |
| C(12)-H(12A)        | 0.9900     |
| C(12)-H(12B)        | 0.9900     |
| C(11)-C(7)          | 1.485(4)   |
| C(11)-H(11A)        | 0.9900     |
| C(11)-H(11B)        | 0.9900     |
|                     |            |
| N(1)-Zr(1)-N(1)#1   | 107.83(13) |
| N(1)-Zr(1)-N(2)     | 102.18(9)  |
| N(1)#1-Zr(1)-N(2)   | 89.99(9)   |
| N(1)-Zr(1)-N(2)#1   | 89.99(9)   |
| N(1)#1-Zr(1)-N(2)#1 | 102.19(9)  |
| N(2)-Zr(1)-N(2)#1   | 159.38(12) |
| N(1)-Zr(1)-N(3)     | 91.49(8)   |
| N(1)#1-Zr(1)-N(3)   | 156.29(9)  |
| N(2)-Zr(1)-N(3)     | 72.18(7)   |
| N(2)#1-Zr(1)-N(3)   | 91.14(8)   |
| N(1)-Zr(1)-N(3)#1   | 156.29(9)  |
| N(1)#1-Zr(1)-N(3)#1 | 91.49(8)   |
| N(2)-Zr(1)-N(3)#1   | 91.14(8)   |
| N(2)#1-Zr(1)-N(3)#1 | 72.18(7)   |
| N(3)-Zr(1)-N(3)#1   | 73.86(11)  |
| C(1)-N(1)-Zr(1)     | 134.5(2)   |
| C(1)-N(1)-H(1A)     | 112.8      |
| Zr(1)-N(1)-H(1A)    | 112.8      |
| C(10)-N(2)-C(7)     | 105.2(2)   |
| C(10)-N(2)-Zr(1)    | 137.35(18) |
| C(7)-N(2)-Zr(1)     | 117.13(17) |
| C(12)-N(3)-C(11)    | 110.3(2)   |
| C(12)-N(3)-C(13)    | 109.9(2)   |
| C(11)-N(3)-C(13)    | 108.6(2)   |
| C(12)-N(3)-Zr(1)    | 109.45(16) |
| C(11)-N(3)-Zr(1)    | 104.64(15) |

|                      |            |
|----------------------|------------|
| C(13)-N(3)-Zr(1)     | 113.81(17) |
| C(10)-C(9)-C(8)      | 107.1(3)   |
| C(10)-C(9)-H(9A)     | 126.5      |
| C(8)-C(9)-H(9A)      | 126.5      |
| C(7)-C(8)-C(9)       | 106.8(3)   |
| C(7)-C(8)-H(8A)      | 126.6      |
| C(9)-C(8)-H(8A)      | 126.6      |
| C(5)-C(4)-C(3)       | 119.8(4)   |
| C(5)-C(4)-H(4A)      | 120.1      |
| C(3)-C(4)-H(4A)      | 120.1      |
| C(4)-C(5)-C(6)       | 120.6(4)   |
| C(4)-C(5)-H(5A)      | 119.7      |
| C(6)-C(5)-H(5A)      | 119.7      |
| C(4)-C(3)-C(2)       | 120.3(4)   |
| C(4)-C(3)-H(3A)      | 119.8      |
| C(2)-C(3)-H(3A)      | 119.8      |
| N(3)-C(13)-H(13A)    | 109.5      |
| N(3)-C(13)-H(13B)    | 109.5      |
| H(13A)-C(13)-H(13B)  | 109.5      |
| N(3)-C(13)-H(13C)    | 109.5      |
| H(13A)-C(13)-H(13C)  | 109.5      |
| H(13B)-C(13)-H(13C)  | 109.5      |
| C(9)-C(10)-N(2)      | 110.5(3)   |
| C(9)-C(10)-H(10A)    | 124.8      |
| N(2)-C(10)-H(10A)    | 124.8      |
| C(1)-C(2)-C(3)       | 120.1(4)   |
| C(1)-C(2)-H(2A)      | 120.0      |
| C(3)-C(2)-H(2A)      | 120.0      |
| C(5)-C(6)-C(1)       | 121.4(3)   |
| C(5)-C(6)-H(6A)      | 119.3      |
| C(1)-C(6)-H(6A)      | 119.3      |
| N(3)-C(12)-C(12)#1   | 110.2(2)   |
| N(3)-C(12)-H(12A)    | 109.6      |
| C(12)#1-C(12)-H(12A) | 109.6      |

|                      |          |
|----------------------|----------|
| N(3)-C(12)-H(12B)    | 109.6    |
| C(12)#1-C(12)-H(12B) | 109.6    |
| H(12A)-C(12)-H(12B)  | 108.1    |
| C(2)-C(1)-C(6)       | 117.8(3) |
| C(2)-C(1)-N(1)       | 122.0(3) |
| C(6)-C(1)-N(1)       | 120.2(3) |
| C(7)-C(11)-N(3)      | 108.6(2) |
| C(7)-C(11)-H(11A)    | 110.0    |
| N(3)-C(11)-H(11A)    | 110.0    |
| C(7)-C(11)-H(11B)    | 110.0    |
| N(3)-C(11)-H(11B)    | 110.0    |
| H(11A)-C(11)-H(11B)  | 108.4    |
| C(8)-C(7)-N(2)       | 110.5(3) |
| C(8)-C(7)-C(11)      | 132.0(3) |
| N(2)-C(7)-C(11)      | 117.5(2) |

---

Symmetry transformations used to generate equivalent atoms:

#1  $-x+1/2, -y+1/2, z$

Table 4. Anisotropic displacement parameters ( $\text{\AA}^2 \times 10^3$ ) for ebzrenppnh2\_0m. The anisotropic displacement factor exponent takes the form:  $-2\pi^2 [ h^2 a^{*2} U^{11} + \dots + 2 h k a^* b^* U^{12} ]$

|       | $U^{11}$ | $U^{22}$ | $U^{33}$ | $U^{23}$ | $U^{13}$ | $U^{12}$ |
|-------|----------|----------|----------|----------|----------|----------|
| Zr(1) | 23(1)    | 34(1)    | 21(1)    | 0        | 0        | -1(1)    |
| N(1)  | 33(1)    | 50(2)    | 35(1)    | 13(1)    | 1(1)     | -1(1)    |
| N(2)  | 26(1)    | 41(2)    | 31(1)    | -11(1)   | -2(1)    | 4(1)     |
| N(3)  | 30(1)    | 35(1)    | 28(1)    | -9(1)    | 3(1)     | 4(1)     |
| C(9)  | 26(2)    | 86(3)    | 131(4)   | -59(3)   | -10(2)   | 15(2)    |
| C(8)  | 31(2)    | 74(3)    | 94(3)    | -47(2)   | -6(2)    | -2(2)    |
| C(4)  | 71(3)    | 93(4)    | 31(2)    | 0(2)     | -2(2)    | -39(3)   |
| C(5)  | 59(2)    | 85(3)    | 36(2)    | -1(2)    | 10(2)    | -20(2)   |
| C(3)  | 87(3)    | 60(2)    | 37(2)    | 18(2)    | -24(2)   | -41(2)   |
| C(13) | 46(2)    | 45(2)    | 61(2)    | -23(2)   | 9(2)     | 10(1)    |
| C(10) | 33(2)    | 52(2)    | 67(2)    | -30(2)   | 1(2)     | 8(1)     |
| C(2)  | 59(2)    | 53(2)    | 36(2)    | 7(2)     | -17(2)   | -19(2)   |
| C(6)  | 55(2)    | 57(2)    | 32(2)    | -3(2)    | 7(2)     | -18(2)   |
| C(12) | 40(2)    | 58(2)    | 23(1)    | -4(1)    | -2(1)    | 0(1)     |
| C(1)  | 45(2)    | 47(2)    | 22(1)    | 4(1)     | -8(1)    | -16(2)   |
| C(11) | 33(2)    | 38(2)    | 40(2)    | -12(1)   | 3(1)     | -7(1)    |
| C(7)  | 29(1)    | 42(2)    | 37(2)    | -13(2)   | 2(1)     | -2(1)    |

Table 5. Hydrogen coordinates ( $\times 10^4$ ) and isotropic displacement parameters ( $\text{\AA}^2 \times 10^3$ )  
for ebzrenpphh2\_0m.

|        | x    | y    | z    | U(eq) |
|--------|------|------|------|-------|
| H(1A)  | 1879 | 4223 | 3962 | 47    |
| H(9A)  | 6793 | 1583 | 4824 | 97    |
| H(8A)  | 6458 | 3293 | 5598 | 79    |
| H(4A)  | 5413 | 5464 | 2047 | 78    |
| H(5A)  | 5622 | 3751 | 2522 | 72    |
| H(3A)  | 3853 | 6464 | 2393 | 73    |
| H(13A) | 2476 | 4881 | 6386 | 76    |
| H(13B) | 1469 | 4233 | 5994 | 76    |
| H(13C) | 2260 | 4961 | 5457 | 76    |
| H(10A) | 4973 | 938  | 4362 | 61    |
| H(2A)  | 2503 | 5741 | 3249 | 59    |
| H(6A)  | 4303 | 3014 | 3358 | 57    |
| H(12A) | 2982 | 3320 | 6978 | 49    |
| H(12B) | 3689 | 2438 | 6507 | 49    |
| H(11A) | 4085 | 4545 | 5217 | 44    |
| H(11B) | 4461 | 4260 | 6100 | 44    |

Table 6. Torsion angles [°] for ebzrenpphh2\_0m.

---

|                         |             |
|-------------------------|-------------|
| N(1)#1-Zr(1)-N(1)-C(1)  | -66.9(2)    |
| N(2)-Zr(1)-N(1)-C(1)    | 27.1(3)     |
| N(2)#1-Zr(1)-N(1)-C(1)  | -169.7(3)   |
| N(3)-Zr(1)-N(1)-C(1)    | 99.2(3)     |
| N(3)#1-Zr(1)-N(1)-C(1)  | 150.0(2)    |
| N(1)-Zr(1)-N(2)-C(10)   | -106.9(3)   |
| N(1)#1-Zr(1)-N(2)-C(10) | 1.3(3)      |
| N(2)#1-Zr(1)-N(2)-C(10) | 128.1(3)    |
| N(3)-Zr(1)-N(2)-C(10)   | 165.4(3)    |
| N(3)#1-Zr(1)-N(2)-C(10) | 92.8(3)     |
| N(1)-Zr(1)-N(2)-C(7)    | 65.1(2)     |
| N(1)#1-Zr(1)-N(2)-C(7)  | 173.4(2)    |
| N(2)#1-Zr(1)-N(2)-C(7)  | -59.84(19)  |
| N(3)-Zr(1)-N(2)-C(7)    | -22.50(19)  |
| N(3)#1-Zr(1)-N(2)-C(7)  | -95.1(2)    |
| N(1)-Zr(1)-N(3)-C(12)   | 176.05(18)  |
| N(1)#1-Zr(1)-N(3)-C(12) | -38.7(3)    |
| N(2)-Zr(1)-N(3)-C(12)   | -81.63(17)  |
| N(2)#1-Zr(1)-N(3)-C(12) | 86.03(17)   |
| N(3)#1-Zr(1)-N(3)-C(12) | 14.96(13)   |
| N(1)-Zr(1)-N(3)-C(11)   | -65.70(17)  |
| N(1)#1-Zr(1)-N(3)-C(11) | 79.5(3)     |
| N(2)-Zr(1)-N(3)-C(11)   | 36.62(16)   |
| N(2)#1-Zr(1)-N(3)-C(11) | -155.72(16) |
| N(3)#1-Zr(1)-N(3)-C(11) | 133.2(2)    |
| N(1)-Zr(1)-N(3)-C(13)   | 52.7(2)     |
| N(1)#1-Zr(1)-N(3)-C(13) | -162.1(2)   |
| N(2)-Zr(1)-N(3)-C(13)   | 155.0(2)    |
| N(2)#1-Zr(1)-N(3)-C(13) | -37.3(2)    |
| N(3)#1-Zr(1)-N(3)-C(13) | -108.4(2)   |
| C(10)-C(9)-C(8)-C(7)    | -1.0(5)     |
| C(3)-C(4)-C(5)-C(6)     | -0.5(5)     |

|                          |           |
|--------------------------|-----------|
| C(5)-C(4)-C(3)-C(2)      | 0.7(5)    |
| C(8)-C(9)-C(10)-N(2)     | 1.3(5)    |
| C(7)-N(2)-C(10)-C(9)     | -1.1(4)   |
| Zr(1)-N(2)-C(10)-C(9)    | 171.6(3)  |
| C(4)-C(3)-C(2)-C(1)      | -0.1(5)   |
| C(4)-C(5)-C(6)-C(1)      | -0.3(5)   |
| C(11)-N(3)-C(12)-C(12)#1 | -158.1(3) |
| C(13)-N(3)-C(12)-C(12)#1 | 82.2(3)   |
| Zr(1)-N(3)-C(12)-C(12)#1 | -43.5(3)  |
| C(3)-C(2)-C(1)-C(6)      | -0.6(4)   |
| C(3)-C(2)-C(1)-N(1)      | 178.0(3)  |
| C(5)-C(6)-C(1)-C(2)      | 0.8(4)    |
| C(5)-C(6)-C(1)-N(1)      | -177.9(3) |
| Zr(1)-N(1)-C(1)-C(2)     | -167.1(2) |
| Zr(1)-N(1)-C(1)-C(6)     | 11.5(4)   |
| C(12)-N(3)-C(11)-C(7)    | 72.0(3)   |
| C(13)-N(3)-C(11)-C(7)    | -167.6(2) |
| Zr(1)-N(3)-C(11)-C(7)    | -45.7(2)  |
| C(9)-C(8)-C(7)-N(2)      | 0.3(5)    |
| C(9)-C(8)-C(7)-C(11)     | -176.8(4) |
| C(10)-N(2)-C(7)-C(8)     | 0.5(4)    |
| Zr(1)-N(2)-C(7)-C(8)     | -174.0(2) |
| C(10)-N(2)-C(7)-C(11)    | 178.0(3)  |
| Zr(1)-N(2)-C(7)-C(11)    | 3.6(3)    |
| N(3)-C(11)-C(7)-C(8)     | -151.8(4) |
| N(3)-C(11)-C(7)-N(2)     | 31.3(3)   |

---

Symmetry transformations used to generate equivalent atoms:

#1  $-x+1/2, -y+1/2, z$

C. Structure from X-ray diffraction of H<sub>2</sub>enp (1)

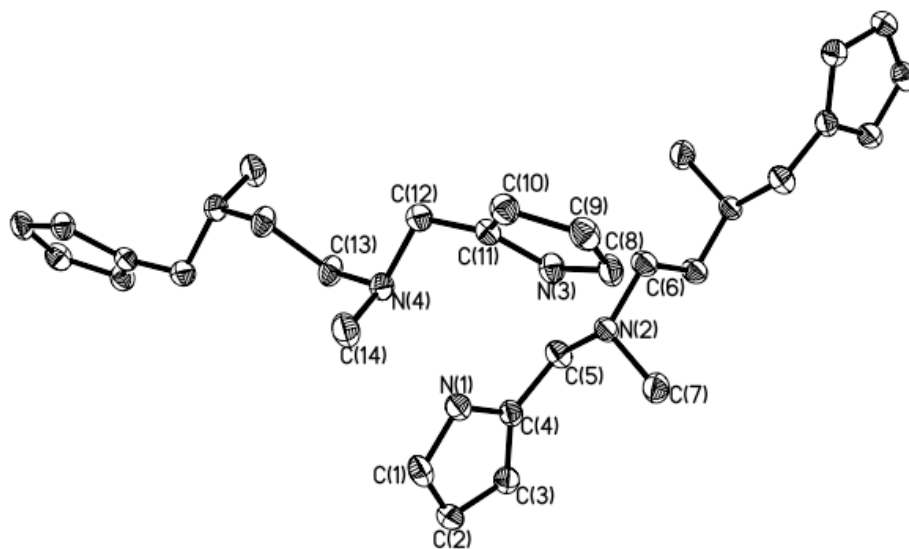



Table 1. Crystal data and structure refinement for eb050608\_0m.

|                                   |                                             |                               |
|-----------------------------------|---------------------------------------------|-------------------------------|
| Identification code               | eb050608_0m                                 |                               |
| Empirical formula                 | C14 H22 N4                                  |                               |
| Formula weight                    | 246.36                                      |                               |
| Temperature                       | 173(2) K                                    |                               |
| Wavelength                        | 0.71073 Å                                   |                               |
| Crystal system                    | Triclinic                                   |                               |
| Space group                       | P -1                                        |                               |
| Unit cell dimensions              | a = 8.5186(5) Å                             | $\alpha = 109.351(4)^\circ$ . |
|                                   | b = 9.2912(5) Å                             | $\beta = 104.362(4)^\circ$ .  |
|                                   | c = 9.5647(6) Å                             | $\gamma = 92.986(4)^\circ$ .  |
| Volume                            | 684.43(7) Å <sup>3</sup>                    |                               |
| Z                                 | 2                                           |                               |
| Density (calculated)              | 1.195 Mg/m <sup>3</sup>                     |                               |
| Absorption coefficient            | 0.074 mm <sup>-1</sup>                      |                               |
| F(000)                            | 268                                         |                               |
| Crystal size                      | 0.62 x 0.13 x 0.11 mm <sup>3</sup>          |                               |
| Theta range for data collection   | 2.35 to 27.92°.                             |                               |
| Index ranges                      | -10<=h<=11, -12<=k<=11, -12<=l<=12          |                               |
| Reflections collected             | 9942                                        |                               |
| Independent reflections           | 3150 [R(int) = 0.0326]                      |                               |
| Completeness to theta = 25.00°    | 99.8 %                                      |                               |
| Absorption correction             | Semi-empirical from equivalents             |                               |
| Max. and min. transmission        | 0.9921 and 0.9559                           |                               |
| Refinement method                 | Full-matrix least-squares on F <sup>2</sup> |                               |
| Data / restraints / parameters    | 3150 / 0 / 165                              |                               |
| Goodness-of-fit on F <sup>2</sup> | 1.021                                       |                               |
| Final R indices [I>2sigma(I)]     | R1 = 0.0446, wR2 = 0.0967                   |                               |
| R indices (all data)              | R1 = 0.0753, wR2 = 0.1088                   |                               |
| Largest diff. peak and hole       | 0.216 and -0.181 e.Å <sup>-3</sup>          |                               |

Table 2. Atomic coordinates ( $\times 10^4$ ) and equivalent isotropic displacement parameters ( $\text{\AA}^2 \times 10^3$ ) for eb050608\_0m.  $U(\text{eq})$  is defined as one third of the trace of the orthogonalized  $U^{ij}$  tensor.

|       | x        | y       | z        | U(eq) |
|-------|----------|---------|----------|-------|
| N(1)  | 25(2)    | 2528(1) | 5462(1)  | 28(1) |
| N(3)  | 4297(2)  | 2663(1) | 7864(1)  | 24(1) |
| N(4)  | 1141(2)  | 3478(1) | 8869(1)  | 22(1) |
| N(2)  | 3389(2)  | 3503(1) | 5089(1)  | 22(1) |
| C(14) | 506(2)   | 2065(2) | 9037(2)  | 33(1) |
| C(1)  | -1413(2) | 1537(2) | 4866(2)  | 32(1) |
| C(7)  | 3532(2)  | 2091(2) | 3885(2)  | 31(1) |
| C(2)  | -2005(2) | 1334(2) | 3345(2)  | 30(1) |
| C(8)  | 5484(2)  | 1733(2) | 7742(2)  | 27(1) |
| C(3)  | -871(2)  | 2229(2) | 3000(2)  | 28(1) |
| C(9)  | 5961(2)  | 1426(2) | 9070(2)  | 28(1) |
| C(12) | 2847(2)  | 4029(2) | 9798(2)  | 26(1) |
| C(5)  | 1844(2)  | 4070(2) | 4605(2)  | 26(1) |
| C(6)  | 4823(2)  | 4700(2) | 5613(2)  | 25(1) |
| C(10) | 5026(2)  | 2204(2) | 10041(2) | 26(1) |
| C(13) | 92(2)    | 4694(2) | 9177(2)  | 25(1) |
| C(11) | 4010(2)  | 2962(2) | 9274(2)  | 23(1) |
| C(4)  | 373(2)   | 2963(2) | 4324(2)  | 23(1) |

Table 3. Bond lengths [Å] and angles [°] for eb050608\_0m.

---

|              |            |
|--------------|------------|
| N(1)-C(1)    | 1.3642(19) |
| N(1)-C(4)    | 1.3696(18) |
| N(1)-H(1)    | 0.8800     |
| N(3)-C(8)    | 1.3663(18) |
| N(3)-C(11)   | 1.3706(17) |
| N(3)-H(3)    | 0.8800     |
| N(4)-C(12)   | 1.4641(19) |
| N(4)-C(14)   | 1.4669(18) |
| N(4)-C(13)   | 1.4754(17) |
| N(2)-C(7)    | 1.4653(17) |
| N(2)-C(5)    | 1.4675(19) |
| N(2)-C(6)    | 1.4721(18) |
| C(14)-H(14A) | 0.9800     |
| C(14)-H(14B) | 0.9800     |
| C(14)-H(14C) | 0.9800     |
| C(1)-C(2)    | 1.360(2)   |
| C(1)-H(1A)   | 0.9500     |
| C(7)-H(7A)   | 0.9800     |
| C(7)-H(7B)   | 0.9800     |
| C(7)-H(7C)   | 0.9800     |
| C(2)-C(3)    | 1.411(2)   |
| C(2)-H(2)    | 0.9500     |
| C(8)-C(9)    | 1.362(2)   |
| C(8)-H(8)    | 0.9500     |
| C(3)-C(4)    | 1.371(2)   |
| C(3)-H(3A)   | 0.9500     |
| C(9)-C(10)   | 1.415(2)   |
| C(9)-H(9)    | 0.9500     |
| C(12)-C(11)  | 1.4956(19) |
| C(12)-H(12A) | 0.9900     |
| C(12)-H(12B) | 0.9900     |
| C(5)-C(4)    | 1.489(2)   |

|                     |            |
|---------------------|------------|
| C(5)-H(5A)          | 0.9900     |
| C(5)-H(5B)          | 0.9900     |
| C(6)-C(6)#1         | 1.538(3)   |
| C(6)-H(6A)          | 0.9900     |
| C(6)-H(6B)          | 0.9900     |
| C(10)-C(11)         | 1.369(2)   |
| C(10)-H(10)         | 0.9500     |
| C(13)-C(13)#2       | 1.538(3)   |
| C(13)-H(13A)        | 0.9900     |
| C(13)-H(13B)        | 0.9900     |
|                     |            |
| C(1)-N(1)-C(4)      | 109.33(13) |
| C(1)-N(1)-H(1)      | 125.3      |
| C(4)-N(1)-H(1)      | 125.3      |
| C(8)-N(3)-C(11)     | 109.28(12) |
| C(8)-N(3)-H(3)      | 125.4      |
| C(11)-N(3)-H(3)     | 125.4      |
| C(12)-N(4)-C(14)    | 111.32(12) |
| C(12)-N(4)-C(13)    | 112.06(11) |
| C(14)-N(4)-C(13)    | 112.80(12) |
| C(7)-N(2)-C(5)      | 111.11(12) |
| C(7)-N(2)-C(6)      | 112.76(12) |
| C(5)-N(2)-C(6)      | 112.44(11) |
| N(4)-C(14)-H(14A)   | 109.5      |
| N(4)-C(14)-H(14B)   | 109.5      |
| H(14A)-C(14)-H(14B) | 109.5      |
| N(4)-C(14)-H(14C)   | 109.5      |
| H(14A)-C(14)-H(14C) | 109.5      |
| H(14B)-C(14)-H(14C) | 109.5      |
| C(2)-C(1)-N(1)      | 108.62(14) |
| C(2)-C(1)-H(1A)     | 125.7      |
| N(1)-C(1)-H(1A)     | 125.7      |
| N(2)-C(7)-H(7A)     | 109.5      |
| N(2)-C(7)-H(7B)     | 109.5      |

|                     |            |
|---------------------|------------|
| H(7A)-C(7)-H(7B)    | 109.5      |
| N(2)-C(7)-H(7C)     | 109.5      |
| H(7A)-C(7)-H(7C)    | 109.5      |
| H(7B)-C(7)-H(7C)    | 109.5      |
| C(1)-C(2)-C(3)      | 106.82(14) |
| C(1)-C(2)-H(2)      | 126.6      |
| C(3)-C(2)-H(2)      | 126.6      |
| C(9)-C(8)-N(3)      | 108.41(13) |
| C(9)-C(8)-H(8)      | 125.8      |
| N(3)-C(8)-H(8)      | 125.8      |
| C(4)-C(3)-C(2)      | 108.10(14) |
| C(4)-C(3)-H(3A)     | 125.9      |
| C(2)-C(3)-H(3A)     | 125.9      |
| C(8)-C(9)-C(10)     | 107.04(13) |
| C(8)-C(9)-H(9)      | 126.5      |
| C(10)-C(9)-H(9)     | 126.5      |
| N(4)-C(12)-C(11)    | 113.54(11) |
| N(4)-C(12)-H(12A)   | 108.9      |
| C(11)-C(12)-H(12A)  | 108.9      |
| N(4)-C(12)-H(12B)   | 108.9      |
| C(11)-C(12)-H(12B)  | 108.9      |
| H(12A)-C(12)-H(12B) | 107.7      |
| N(2)-C(5)-C(4)      | 113.01(12) |
| N(2)-C(5)-H(5A)     | 109.0      |
| C(4)-C(5)-H(5A)     | 109.0      |
| N(2)-C(5)-H(5B)     | 109.0      |
| C(4)-C(5)-H(5B)     | 109.0      |
| H(5A)-C(5)-H(5B)    | 107.8      |
| N(2)-C(6)-C(6)#1    | 116.35(15) |
| N(2)-C(6)-H(6A)     | 108.2      |
| C(6)#1-C(6)-H(6A)   | 108.2      |
| N(2)-C(6)-H(6B)     | 108.2      |
| C(6)#1-C(6)-H(6B)   | 108.2      |
| H(6A)-C(6)-H(6B)    | 107.4      |

|                      |            |
|----------------------|------------|
| C(11)-C(10)-C(9)     | 107.78(13) |
| C(11)-C(10)-H(10)    | 126.1      |
| C(9)-C(10)-H(10)     | 126.1      |
| N(4)-C(13)-C(13)#2   | 116.07(15) |
| N(4)-C(13)-H(13A)    | 108.3      |
| C(13)#2-C(13)-H(13A) | 108.3      |
| N(4)-C(13)-H(13B)    | 108.3      |
| C(13)#2-C(13)-H(13B) | 108.3      |
| H(13A)-C(13)-H(13B)  | 107.4      |
| C(10)-C(11)-N(3)     | 107.49(12) |
| C(10)-C(11)-C(12)    | 130.16(13) |
| N(3)-C(11)-C(12)     | 122.24(13) |
| N(1)-C(4)-C(3)       | 107.13(13) |
| N(1)-C(4)-C(5)       | 122.86(13) |
| C(3)-C(4)-C(5)       | 130.00(14) |

---

Symmetry transformations used to generate equivalent atoms:

#1  $-x+1, -y+1, -z+1$  #2  $-x, -y+1, -z+2$

Table 4. Anisotropic displacement parameters ( $\text{\AA}^2 \times 10^3$ ) for eb050608\_0m. The anisotropic displacement factor exponent takes the form:  $-2p^2[ h^2 a^* U^{11} + \dots + 2 h k a^* b^* U^{12} ]$

|       | U <sup>11</sup> | U <sup>22</sup> | U <sup>33</sup> | U <sup>23</sup> | U <sup>13</sup> | U <sup>12</sup> |
|-------|-----------------|-----------------|-----------------|-----------------|-----------------|-----------------|
| N(1)  | 23(1)           | 33(1)           | 24(1)           | 9(1)            | 7(1)            | 0(1)            |
| N(3)  | 22(1)           | 28(1)           | 26(1)           | 13(1)           | 8(1)            | 6(1)            |
| N(4)  | 19(1)           | 24(1)           | 24(1)           | 7(1)            | 8(1)            | 6(1)            |
| N(2)  | 19(1)           | 22(1)           | 24(1)           | 8(1)            | 6(1)            | 2(1)            |
| C(14) | 29(1)           | 28(1)           | 45(1)           | 11(1)           | 19(1)           | 5(1)            |
| C(1)  | 25(1)           | 37(1)           | 37(1)           | 14(1)           | 14(1)           | -1(1)           |
| C(7)  | 31(1)           | 25(1)           | 38(1)           | 8(1)            | 16(1)           | 4(1)            |
| C(2)  | 22(1)           | 30(1)           | 32(1)           | 4(1)            | 7(1)            | -1(1)           |
| C(8)  | 21(1)           | 29(1)           | 34(1)           | 10(1)           | 13(1)           | 5(1)            |
| C(3)  | 25(1)           | 32(1)           | 25(1)           | 9(1)            | 8(1)            | 3(1)            |
| C(9)  | 22(1)           | 27(1)           | 36(1)           | 13(1)           | 7(1)            | 7(1)            |
| C(12) | 21(1)           | 26(1)           | 26(1)           | 5(1)            | 7(1)            | 3(1)            |
| C(5)  | 22(1)           | 26(1)           | 33(1)           | 13(1)           | 7(1)            | 4(1)            |
| C(6)  | 23(1)           | 30(1)           | 23(1)           | 10(1)           | 5(1)            | -2(1)           |
| C(10) | 24(1)           | 29(1)           | 26(1)           | 13(1)           | 7(1)            | 3(1)            |
| C(13) | 25(1)           | 31(1)           | 24(1)           | 11(1)           | 11(1)           | 13(1)           |
| C(11) | 18(1)           | 23(1)           | 25(1)           | 6(1)            | 7(1)            | 0(1)            |
| C(4)  | 20(1)           | 23(1)           | 28(1)           | 9(1)            | 9(1)            | 4(1)            |

Table 5. Hydrogen coordinates ( $\times 10^4$ ) and isotropic displacement parameters ( $\text{\AA}^2 \times 10^3$ )  
for eb050608\_0m.

|        | x     | y    | z     | U(eq) |
|--------|-------|------|-------|-------|
| H(1)   | 633   | 2838 | 6427  | 33    |
| H(3)   | 3796  | 3016 | 7149  | 29    |
| H(14A) | 1095  | 1228 | 8600  | 49    |
| H(14B) | -665  | 1783 | 8488  | 49    |
| H(14C) | 664   | 2240 | 10134 | 49    |
| H(1A)  | -1917 | 1067 | 5420  | 39    |
| H(7A)  | 2686  | 1260 | 3748  | 47    |
| H(7B)  | 4617  | 1795 | 4191  | 47    |
| H(7C)  | 3389  | 2273 | 2912  | 47    |
| H(2)   | -2992 | 709  | 2649  | 36    |
| H(8)   | 5905  | 1362 | 6877  | 32    |
| H(3A)  | -955  | 2310 | 2020  | 33    |
| H(9)   | 6769  | 808  | 9301  | 33    |
| H(12A) | 2921  | 4172 | 10886 | 31    |
| H(12B) | 3185  | 5048 | 9760  | 31    |
| H(5A)  | 1802  | 4278 | 3647  | 32    |
| H(5B)  | 1818  | 5056 | 5415  | 32    |
| H(6A)  | 5801  | 4284 | 6040  | 30    |
| H(6B)  | 4674  | 5587 | 6467  | 30    |
| H(10)  | 5091  | 2201 | 11046 | 31    |
| H(13A) | -1013 | 4287 | 8444  | 30    |
| H(13B) | 542   | 5573 | 8956  | 30    |



Table 6. Torsion angles [°] for eb050608\_0m.

---

|                          |             |
|--------------------------|-------------|
| C(4)-N(1)-C(1)-C(2)      | -0.32(17)   |
| N(1)-C(1)-C(2)-C(3)      | 0.50(17)    |
| C(11)-N(3)-C(8)-C(9)     | 0.16(17)    |
| C(1)-C(2)-C(3)-C(4)      | -0.51(17)   |
| N(3)-C(8)-C(9)-C(10)     | -0.04(17)   |
| C(14)-N(4)-C(12)-C(11)   | 65.67(15)   |
| C(13)-N(4)-C(12)-C(11)   | -166.95(12) |
| C(7)-N(2)-C(5)-C(4)      | 62.17(16)   |
| C(6)-N(2)-C(5)-C(4)      | -170.37(11) |
| C(7)-N(2)-C(6)-C(6)#1    | 61.7(2)     |
| C(5)-N(2)-C(6)-C(6)#1    | -64.9(2)    |
| C(8)-C(9)-C(10)-C(11)    | -0.09(17)   |
| C(12)-N(4)-C(13)-C(13)#2 | -63.8(2)    |
| C(14)-N(4)-C(13)-C(13)#2 | 62.8(2)     |
| C(9)-C(10)-C(11)-N(3)    | 0.19(16)    |
| C(9)-C(10)-C(11)-C(12)   | -175.81(14) |
| C(8)-N(3)-C(11)-C(10)    | -0.22(16)   |
| C(8)-N(3)-C(11)-C(12)    | 176.17(13)  |
| N(4)-C(12)-C(11)-C(10)   | -119.46(17) |
| N(4)-C(12)-C(11)-N(3)    | 65.05(18)   |
| C(1)-N(1)-C(4)-C(3)      | -0.01(16)   |
| C(1)-N(1)-C(4)-C(5)      | 178.60(13)  |
| C(2)-C(3)-C(4)-N(1)      | 0.32(16)    |
| C(2)-C(3)-C(4)-C(5)      | -178.15(13) |
| N(2)-C(5)-C(4)-N(1)      | 63.12(17)   |
| N(2)-C(5)-C(4)-C(3)      | -118.62(17) |

---

Symmetry transformations used to generate equivalent atoms:

#1 -x+1,-y+1,-z+1 #2 -x,-y+1,-z+2

Table 7. Hydrogen bonds for eb050608\_0m [ $\text{\AA}$  and  $^\circ$ ].

| D-H...A          | d(D-H) | d(H...A) | d(D...A)   | $\angle$ (DHA) |
|------------------|--------|----------|------------|----------------|
| N(1)-H(1)...N(4) | 0.88   | 2.13     | 2.9610(17) | 156.8          |
| N(3)-H(3)...N(2) | 0.88   | 2.12     | 2.9443(17) | 156.5          |

Symmetry transformations used to generate equivalent atoms:

#1  $-x+1, -y+1, -z+1$  #2  $-x, -y+1, -z+2$

D.  $^1\text{H-NMR}$  spectrum of complex **2**, with proton assignment (500 MHz,  $\text{CDCl}_3$ )

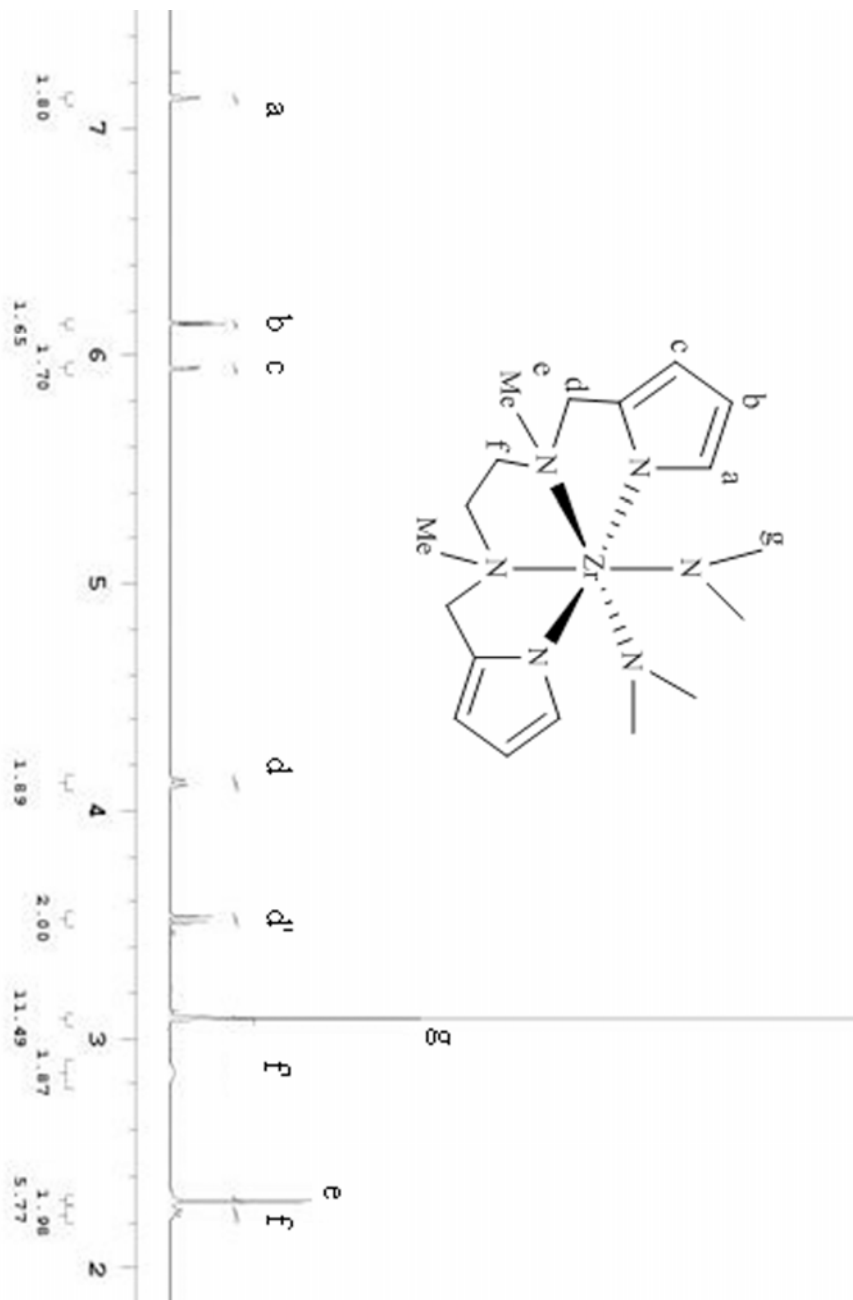

E.  $^1\text{H-NMR}$  spectrum of complex **3c** (500 MHz,  $\text{CDCl}_3$ )

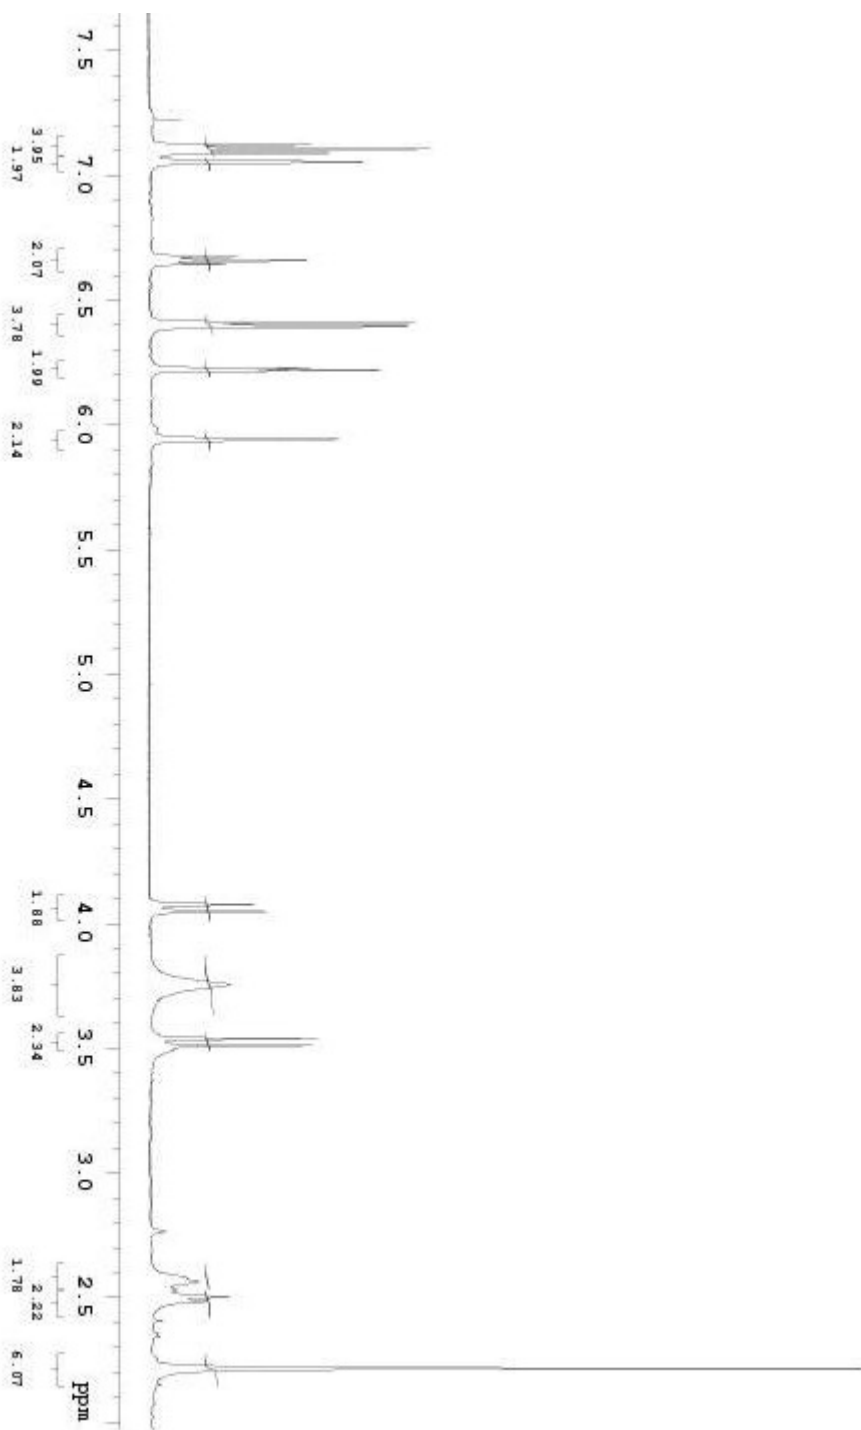

Supplement: b804172e.pdf [file b804172e.pdf]
